# Supplementary material for: Estimating Parameters in a Sea Ice Model using an Ensemble Kalman Filter
Source: Copernicus journal article supplement (doi:10.5194/tc-2020-96), 2020-05-13
Supplement: Supplementary file 1 [file tc-2020-96-supplement.pdf]

## Supplemental figures

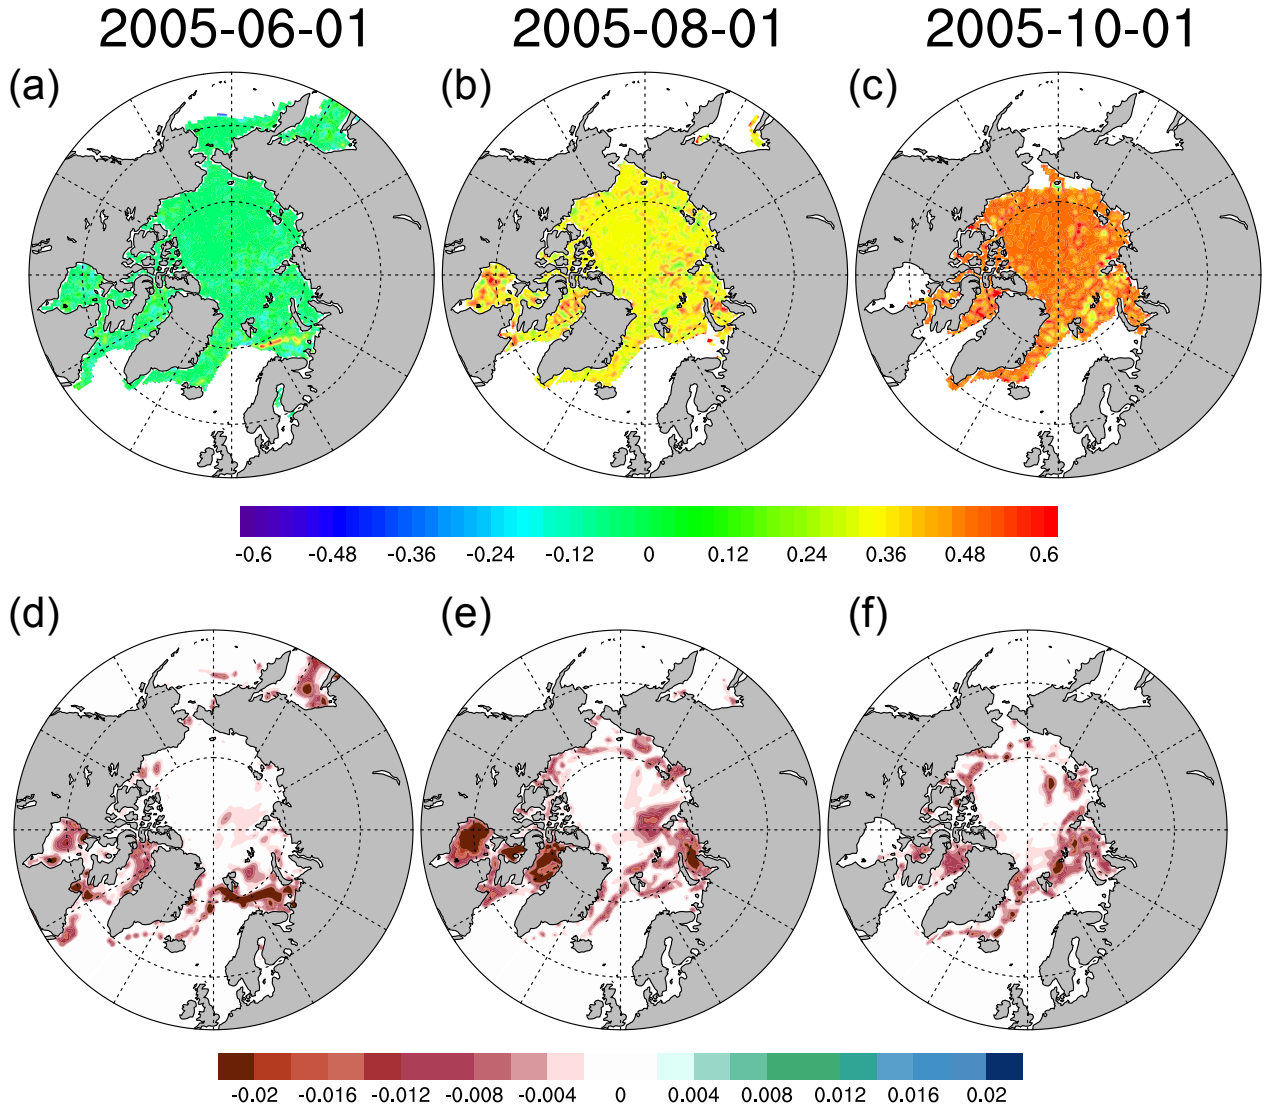

Figure S1. The posterior values of  $R_{\text{snow}}$  for the experiment DASitPEcst on (a) 2005-06-01, (b) 2005-08-01, and (c) 2005-10-01, and the differences between the ensemble spread of posterior  $R_{\text{snow}}$  and that of prior  $R_{\text{snow}}$  (the posterior minus prior) for the experiment DASitPEcst on (d) 2005-06-01, (e) 2005-08-01, and (f) 2005-10-01.
